# Supplementary material
Source: PubMed Central journal article supplement (PMC7399701)
Supplement: jiaa156_suppl_supplementary_appendix_1.pdf [file jiaa156_suppl_supplementary_appendix_1.pdf]

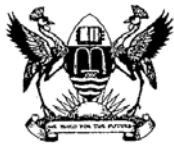

PLACENTA HISTOPATHOLOGY READING - CASE RECORD FORM

(Fill out 1 CRF for each placenta delivered)

|                                                                                                          |                                                                    |
|----------------------------------------------------------------------------------------------------------|--------------------------------------------------------------------|
| 1. Study ID # B 3 -- 0_ -- _ _ _ _ _                                                                     | 2. Reader _____                                                    |
| If more than 1 placenta tick one of the following: <input type="checkbox"/> A <input type="checkbox"/> B |                                                                    |
| 3. Date slide made  _ _ _ _ / _ _ _ _ / _ _ _ _ <br>day month year                                       | 4. Slide read date  _ _ _ _ / _ _ _ _ / _ _ _ _ <br>day month year |

| Sample preservation and adequacy                           | Evaluation |
|------------------------------------------------------------|------------|
| 5. Autolysis (0= No 1=Yes)                                 |            |
| 6. Haemolysis (0=No 1=Yes)                                 |            |
| 7. Formalin pigment (0= Absent 1= Mild 2= Severe)          |            |
| 8. Amnion/chorion (0= Absent, 1=Chorion only 2=Both 3=N/A) |            |

| Malaria related assessment using basal plate                                                      | Evaluation |
|---------------------------------------------------------------------------------------------------|------------|
| 9. $\geq$ 500 RBCs in the section (0=No 1=Yes) <i>If yes, proceed to step 11</i>                  |            |
| 10. If less than 500 above, write the exact number                                                |            |
| 11. Parasitized RBCs (0=No 1=Yes) <i>If no, proceed to step 14</i>                                |            |
| 12. Number of RBCs infected with parasites                                                        |            |
| 13. Number of RBCs counted (should attempt to count at least 500 RBCs)                            |            |
| 14. Free macrophages with hemozoin ( 0=Absent 1= Mild 2=Abundant)                                 |            |
| 15. Haemozoin in fibrin (0=No 1=Yes 2=N/A (Due to formalin pigment)                               |            |
| 16. Number of fields (40x) with malaria pigment in fibrin (out of >100)                           |            |
| 17. Number of fields (40x) counted for malaria pigment in fibrin                                  |            |
| 18. Intervillous inflammation identified (0=No 1= Yes 2=Massive) <i>If no, proceed to step 20</i> |            |
| 19. Inflammatory cells identified (1=Neutrophils 2= Monocytes/macrophages 3=Both)                 |            |

| Chorioamnionitis assessment using the fetal plate, cord or placental membranes | Evaluation                                                                          |
|--------------------------------------------------------------------------------|-------------------------------------------------------------------------------------|
| 20. Sample types reviewed for chorioamnionitis (circle all that apply)         | <input type="checkbox"/> FP <input type="checkbox"/> UC <input type="checkbox"/> PM |
| 21. Chorioamnionitis identified (0=absent 1=mild 2= severe)                    |                                                                                     |

Comments (if any)
