# Supplementary material
Source: PubMed Central journal article supplement (PMC7399701)
Supplement: jiaa156_suppl_supplementary_appendix_2.pdf [file jiaa156_suppl_supplementary_appendix_2.pdf]

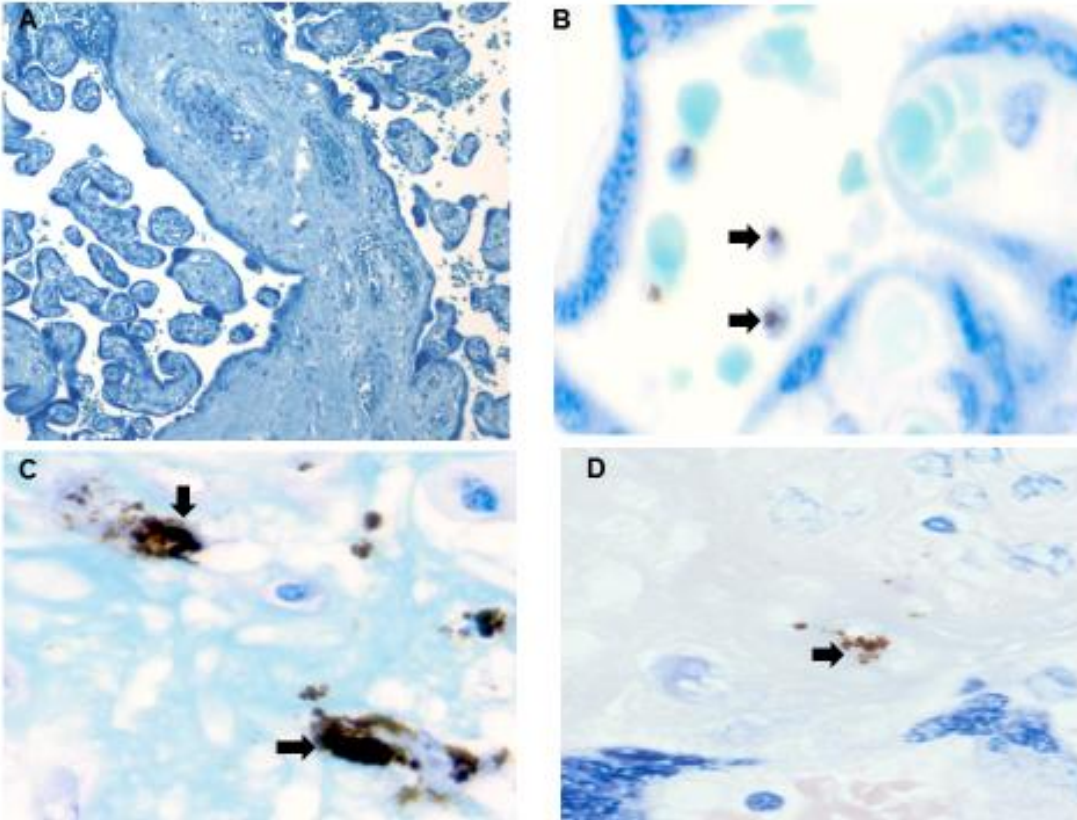

**Appendix 2: Representative placental histology.** Giemsa stained placental sections from women with **(A)** normal placental histology; **(B)** parasitized erythrocytes within the intervillous space (arrows); and malaria pigment (hemozoin) deposition in placental fibrin with arrows pointing to heavy **(C)** and light **(D)** deposits.
